# Supplementary material for: First-principles characterization of two-dimensional (CH3(CH2)3NH3)2(CH3NH3)n−1GenI3n+1 perovskite
Source: Royal Society of Chemistry journal article supplement (doi:10.1039/c8ta10055a), 2018-01-01
Supplement: c8ta10055a1.pdf [file c8ta10055a1.pdf]

## Supplementary Information

### First-Principles Characterization of Two-Dimensional (CH<sub>3</sub>(CH<sub>2</sub>)<sub>3</sub>NH<sub>3</sub>)<sub>2</sub>(CH<sub>3</sub>NH<sub>3</sub>)<sub>n-1</sub>Ge<sub>n</sub>I<sub>3n+1</sub> Perovskite

Liyuan Wu<sup>a,b</sup>, Pengfei Lu<sup>a</sup>, Yuheng Li<sup>b</sup>, Yan Sun<sup>b</sup>, Joseph Wong<sup>b</sup>, and Kesong Yang<sup>\*b</sup>

<sup>a</sup>*State Key Laboratory of Information Photonics and Optical Communications, Beijing University of Posts and Telecommunications, Beijing 100876, China*

<sup>b</sup>*Department of NanoEngineering, University of California San Diego, 9500 Gilman Drive, Mail Code 0448, La Jolla, California 92093-0448, United States*

\* Correspondence: [kesong@ucsd.edu](mailto:kesong@ucsd.edu)

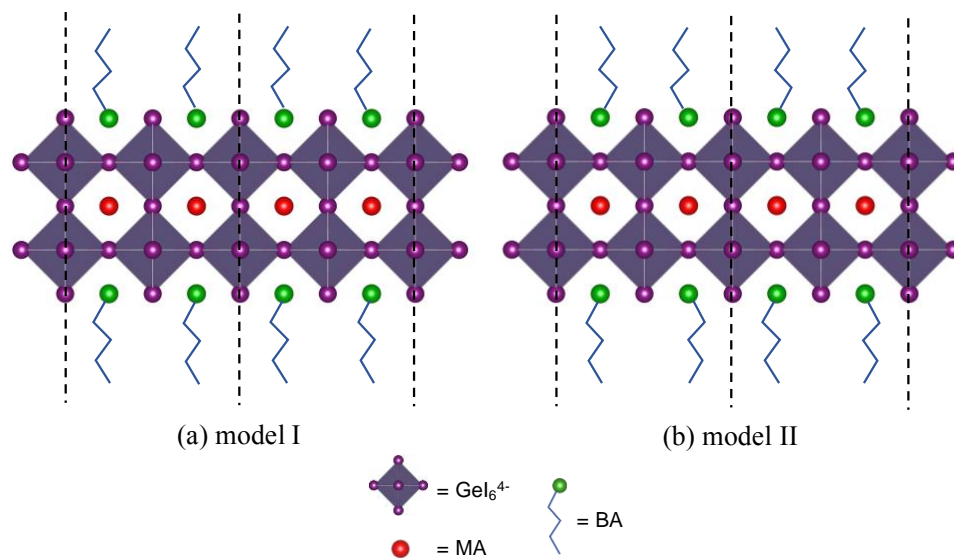

**Figure S1** Schematic crystal structures of 2D perovskites. (a) Model I: all the ammonium heads of BA cations are along the same direction, and (b) Model II: the ammonium heads exhibit an alternative order.

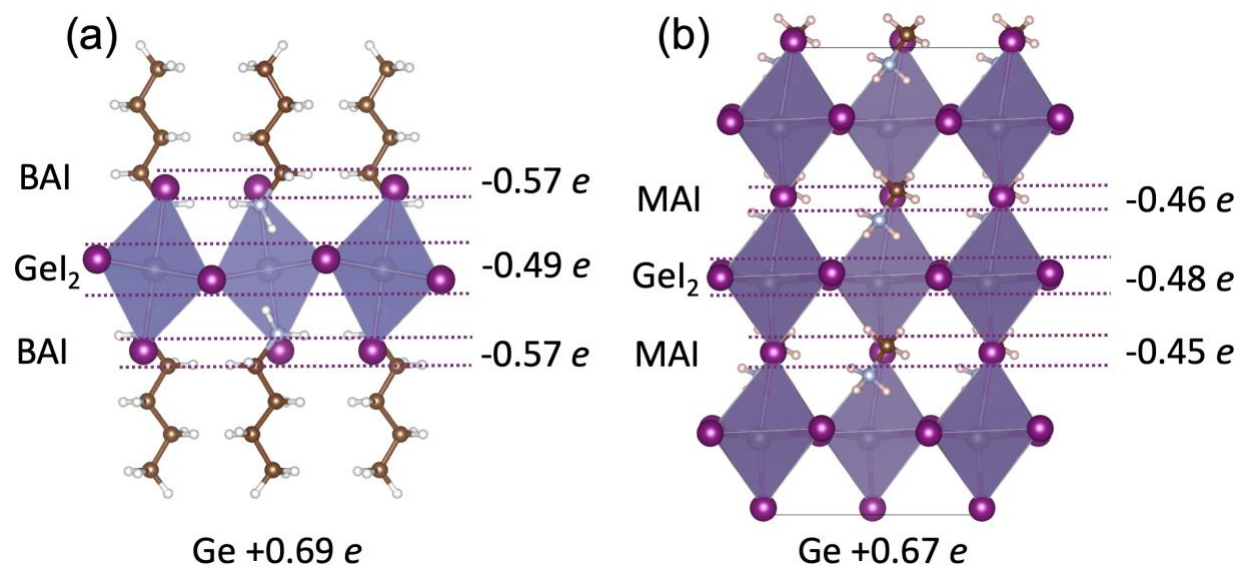

**Figure S2** Bader charge analysis of Ge cation and I anions for (a) 2D perovskite  $(\text{BA})_2\text{GeI}_4$  and (b) 3D perovskite  $\text{MAGeI}_3$ .

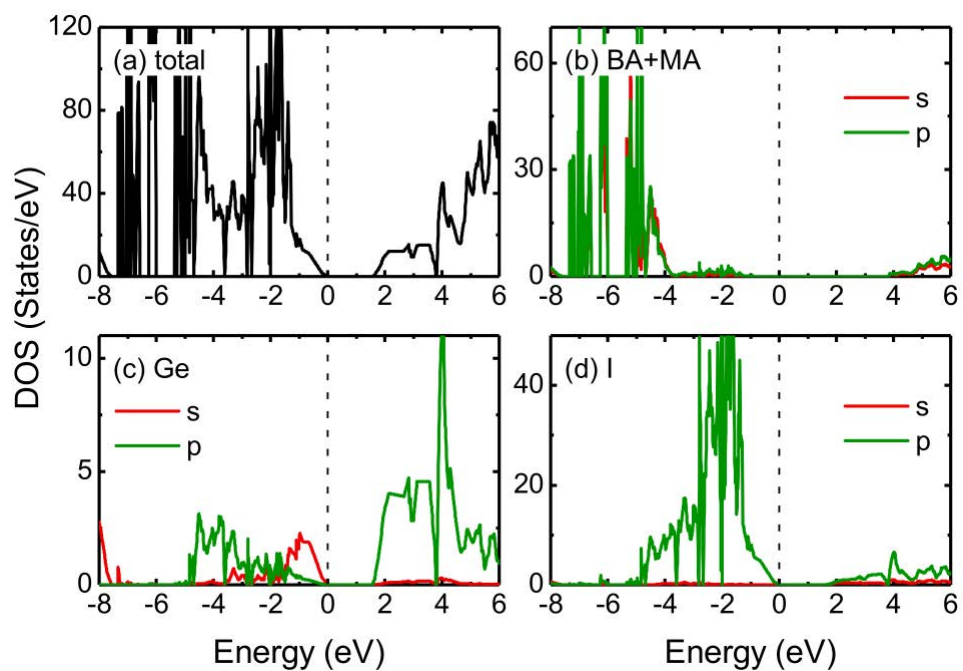

**Figure S3** Density of states (DOS) of  $(\text{BA})_2(\text{MA})\text{Ge}_2\text{I}_7$ . (a) Total DOS, and partial DOS of (b) BA and MA molecules, (c) Ge, and (d) I. Red and green lines donate the *s* and *p* contribution, respectively. The Fermi level is indicated by the black vertical dash line.

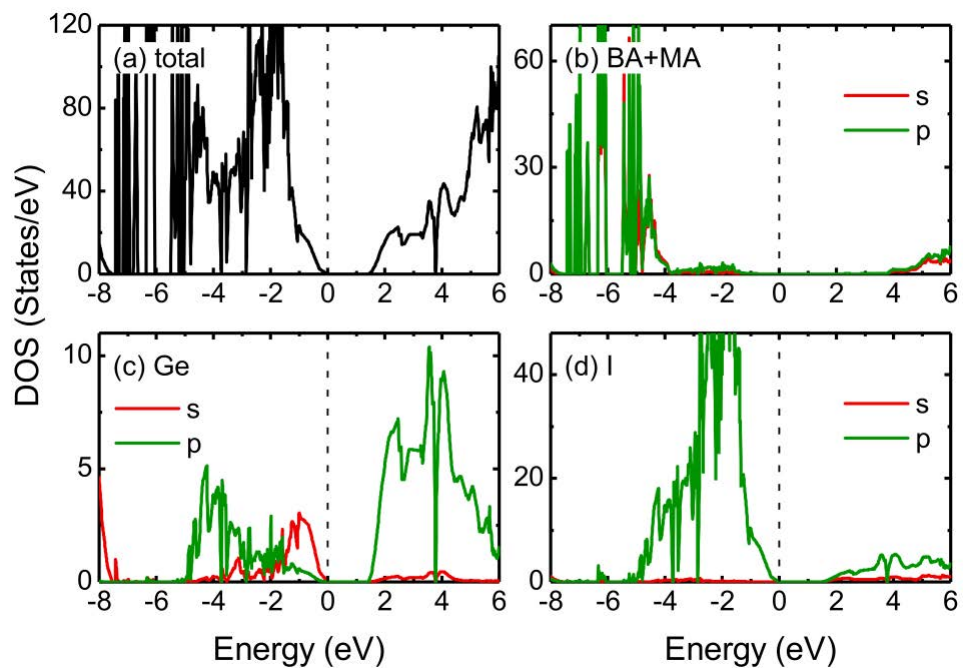

**Figure S4** Density of states (DOS) of  $(\text{BA})_2(\text{MA})_2\text{Ge}_3\text{I}_{10}$ . (a) Total DOS, and partial DOS of (b) BA and MA molecules, (c) Ge, and (d) I. Red and green lines donate the  $s$  and  $p$  contribution, respectively. The Fermi level is indicated by the black vertical dash line.

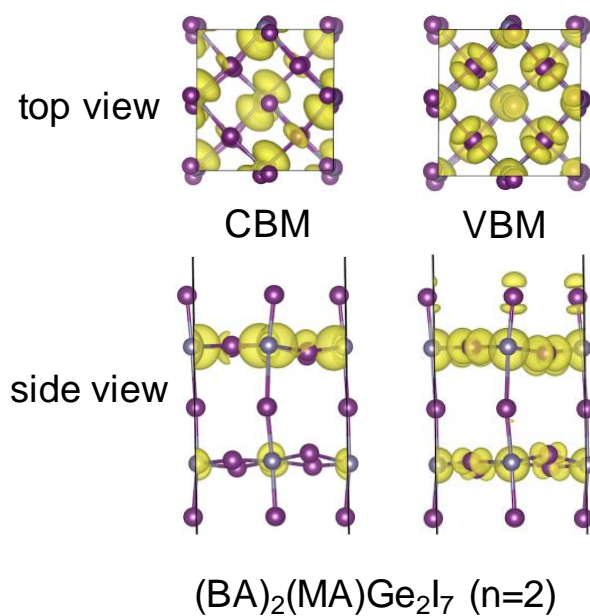

**Figure S5** Top and partial side views of decomposed charge densities of CBM and VBM of  $(\text{BA})_2(\text{MA})\text{Ge}_2\text{I}_7$ . The isosurface level is  $0.0015 \text{ e/Bohr}^3$ . The organic molecules are hidden for a clear display of charge density.

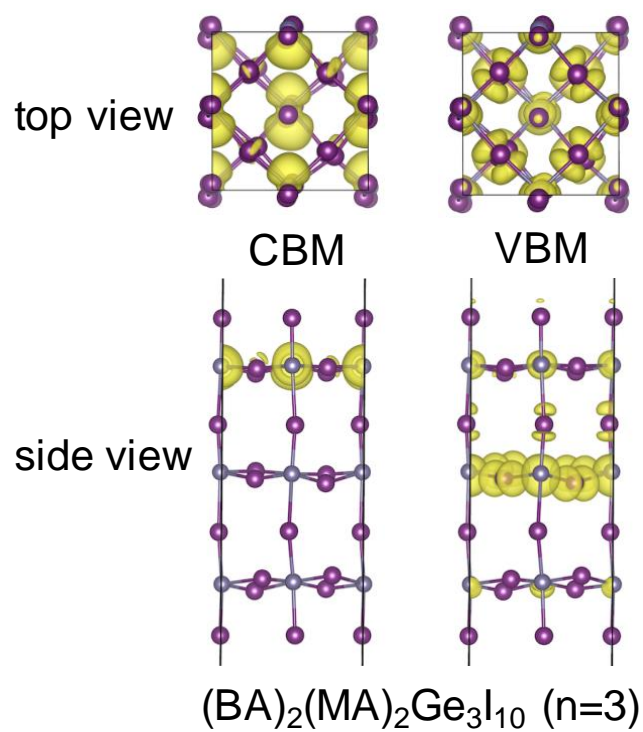

**Figure S6** Top and partial side views of decomposed charge densities of CBM and VBM of  $(\text{BA})_2(\text{MA})_2\text{Ge}_3\text{I}_{10}$ .

**Table S1.** Calculated lattice constants of 2D perovskites  $(\text{BA})_2(\text{MA})_{n-1}\text{GenI}_{3n+1}$  for Mode I and Model II within the PBE functional.

| System | Structure | a (Å) | b (Å) | c (Å)  |
|--------|-----------|-------|-------|--------|
| n=1    | Model I   | 8.399 | 8.648 | 30.183 |
|        | Model II  | 8.164 | 8.547 | 29.109 |
|        | Exp.[1]   | 8.272 | 8.722 | 28.014 |
| n=2    | Model I   | 8.443 | 8.506 | 42.127 |
|        | Model II  | 8.454 | 8.777 | 41.183 |
| n=3    | Model I   | 8.506 | 8.785 | 54.793 |
|        | Model II  | 8.393 | 8.714 | 54.192 |

[1] D. B. Mitzi, Chem. Mater., 1996, 8, 791–800.

**Table S2.** The total number of unit cell atoms  $m$ , and the energy difference between model I and model II  $\Delta E = (E_{\text{model I}} - E_{\text{model II}})/m$ .

| System | $m$ | $\Delta E$ (meV/atom) |
|--------|-----|-----------------------|
| n=1    | 156 | 0.744                 |
| n=2    | 204 | 1.470                 |
| n=3    | 252 | 1.611                 |
